# Supplementary material
Source: publisher figshare collection journal article supplement (https://acs.figshare.com/ndownloader/files/9680470)
Supplement: Supplementary file 1 [file 9680470]

Supporting Information for  
*Environmental Science and Technology*

**Carbon, Hydrogen, and Nitrogen Isotope  
Fractionation Trends in *N*-Nitrosodimethylamine  
Reflect the Formation Pathway during  
Chloramination of Tertiary Amines**

Stephanie Spahr<sup>1,2</sup>, Urs von Gunten<sup>1,2,3</sup>, and Thomas B. Hofstetter<sup>\*,1,3</sup>

<sup>1</sup>Eawag, Swiss Federal Institute of Aquatic Science and Technology

<sup>2</sup>School of Architecture, Civil and Environmental Engineering (ENAC), Ecole Polytechnique  
Fédérale de Lausanne (EPFL)

<sup>3</sup>Institute of Biogeochemistry and Pollutant Dynamics (IBP), ETH Zürich

\*Corresponding author: [thomas.hofstetter@eawag.ch](mailto:thomas.hofstetter@eawag.ch)  
phone +41 58 765 50 76, fax +41 58 765 50 28

14 Pages, 9 Figures, 3 Tables

## Contents

|                                                                                                                     |           |
|---------------------------------------------------------------------------------------------------------------------|-----------|
| <b>S1 Safety considerations</b>                                                                                     | <b>3</b>  |
| <b>S2 Chemicals</b>                                                                                                 | <b>3</b>  |
| <b>S3 Stable isotope analysis</b>                                                                                   | <b>4</b>  |
| S3.1 Reference isotope signatures . . . . .                                                                         | 4         |
| S3.2 Method quantification limits (MQLs) for C and N isotope analysis of DMTA . . . .                               | 4         |
| <b>S4 Isotope fractionation in tertiary amines during chloramination</b>                                            | <b>5</b>  |
| S4.1 Isotope fractionation in DMTA and DMBA . . . . .                                                               | 5         |
| S4.2 Bulk isotope enrichment factors . . . . .                                                                      | 6         |
| S4.3 <sup>15</sup> N equilibrium isotope effect associated with the deprotonation of DMTA . . . . .                 | 6         |
| S4.4 Isotope enrichment factors and kinetic isotope effects associated with the reaction of DMTA and DMBA . . . . . | 7         |
| <b>S5 C, H, and N isotope ratios of NDMA during chloramination of four tertiary amines</b>                          | <b>8</b>  |
| <b>S6 Impact of phosphate buffer concentration and buffer type on N isotope fractionation in NDMA</b>               | <b>10</b> |
| <b>S7 Chloramination of 2-thiophenemethanol</b>                                                                     | <b>11</b> |
| <b>S8 Impact of solution pH on isotope fractionation in NDMA</b>                                                    | <b>12</b> |
| <b>S9 References</b>                                                                                                | <b>14</b> |

## S1 Safety considerations

*N*-Nitrosamines are mutagenic and probably carcinogenic to humans. Wear appropriate protective clothing, goggles, and gloves and work in a well-ventilated chemical fume hood. Keep away from heat, sparks, and flames.

## S2 Chemicals

All chemicals were used without further purification. 5-(dimethylaminomethyl)furfuryl alcohol hydrochloride (DFUR, 96%) and *N,N*-dimethylthiophene-2-methylamine (DMTA) were purchased from ABCR and Santa Cruz Biotechnology, respectively. Ranitidine hydrochloride, *N,N*-dimethylbenzylamine (DMBA, 99%), *N*-nitrosodimethylamine (NDMA, 5000  $\mu\text{g}/\text{ml}$  in methanol, 99.9%), 2-thiophenemethanol (98%), 2,2'-azino-bis(3-ethylbenzothiazoline-6-sulfonic acid) diammonium salt (ABTS,  $\geq 98\%$ ), potassium iodide ( $\geq 99\%$ ), sodium nitrite ( $\text{NaNO}_2$ , 99%), sodium thiosulfate ( $\text{Na}_2\text{S}_2\text{O}_3$ ,  $\geq 98\%$ ), and potassium phosphate monobasic ( $\text{KH}_2\text{PO}_4$ , puriss,  $\geq 99.5\%$ ) were purchased from Sigma Aldrich. Boric acid ( $>98\%$ ) was obtained from Fluka. For  $\text{NH}_2\text{Cl}$  preparation, we used sodium hypochlorite (6-14%  $\text{HOCl}$ , Sigma-Aldrich) and ammonium chloride ( $\text{NH}_4\text{Cl}$ , 99.5%, Fluka) or  $^{15}\text{N}$ -enriched ammonium sulfate ( $(\text{NH}_4)_2\text{SO}_4$ , USGS26) that was purchased from the International Atomic Energy Agency (IAEA).<sup>1</sup>

Analyte stock solutions were made in ethyl acetate (99.7%, Chromasolv for HPLC, Sigma Aldrich), or methanol (99.99%, Fisher Scientific). These solvents were also used for solid phase extraction (SPE) in addition to pentane (99.0%, Sigma-Aldrich). Aqueous solutions were prepared with deionised water (18.1  $\text{M}\Omega \cdot \text{cm}$ , Barnstead NANOpure Diamond Water Purification System). The pH value of buffered solutions was adjusted with sodium hydroxide pellets ( $\text{NaOH}$ , puriss,  $\geq 99\%$ , Sigma-Aldrich) or aqueous  $\text{NaOH}$  solution (Sigma-Aldrich). For SPME-GC/MS and SPME-GC/IRMS analyses the ionic strength of the samples was raised with sodium chloride ( $\text{NaCl}$ , 99.5%, Merck). Helium ( $\text{He}$ , 99.999%) was used as carrier gas for GC/MS and GC/IRMS analysis. Reference gases for GC/IRMS measurements were  $\text{CO}_2$  (99.999%),  $\text{N}_2$  (99.999%),  $\text{H}_2$  (99.999%) and  $\text{O}_2$  (99.999%) from Carbogas (Rümlang, Switzerland).

## S3 Stable isotope analysis

### S3.1 Reference isotope signatures

**Table S1** C and N isotope signatures of in-house standards measured with elemental analyzer isotope ratio mass spectrometry (EA/IRMS).

| Compound                                | $\delta^{15}\text{N}$       | $\delta^{13}\text{C}$ |
|-----------------------------------------|-----------------------------|-----------------------|
| ranitidine                              | $-3.36 \pm 0.11$            | $-28.24 \pm 0.03$     |
| DFUR                                    | $-2.22 \pm 0.39$            | $-19.76 \pm 0.03$     |
| DMTA                                    | $-4.52 \pm 0.08$            | $-35.54 \pm 0.03$     |
| $\text{NH}_4\text{Cl}$                  | $-1.44 \pm 0.03^{\text{a}}$ | -                     |
| $(\text{NH}_4)_2\text{SO}_4^{\text{b}}$ | $+53.7 \pm 0.4^{\text{a}}$  | -                     |

<sup>a</sup> Reported as proxy for the initial  $\delta^{15}\text{N}$  value of  $\text{NH}_2\text{Cl}$  generated from the reaction of  $\text{HOCl}$  with  $\text{NH}_4\text{Cl}$  or  $(\text{NH}_4)_2\text{SO}_4$

<sup>b</sup> Standard reference material USG26 obtained from IAEA <sup>1</sup>

### S3.2 Method quantification limits (MQLs) for C and N isotope analysis of DMTA

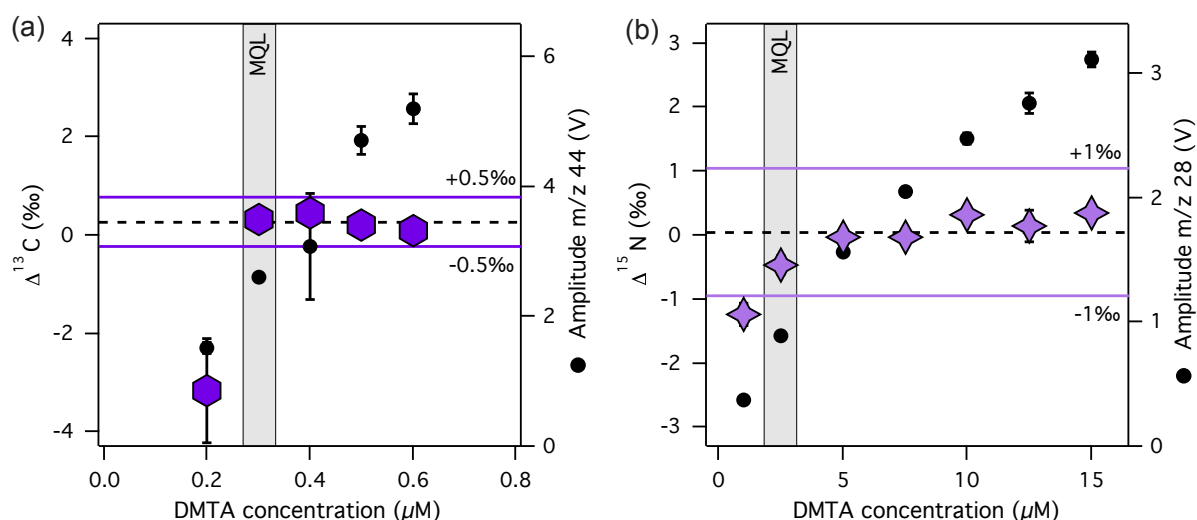

**Figure S1** Accuracies of (a) C and (b) N isotope signatures of DMTA as function of the DMTA concentration. Amplitudes increased with increasing DMTA concentrations. MQLs were determined according to the moving mean procedure of Jochmann et al.<sup>2</sup> with intervals of  $\pm 0.5\text{‰}$  and  $\pm 1\text{‰}$  for C and N isotope analysis, respectively (purple lines). MQLs are indicated as grey bars and moving means by dashed lines.

## S4 Isotope fractionation in tertiary amines during chloramination

### S4.1 Isotope fractionation in DMTA and DMBA

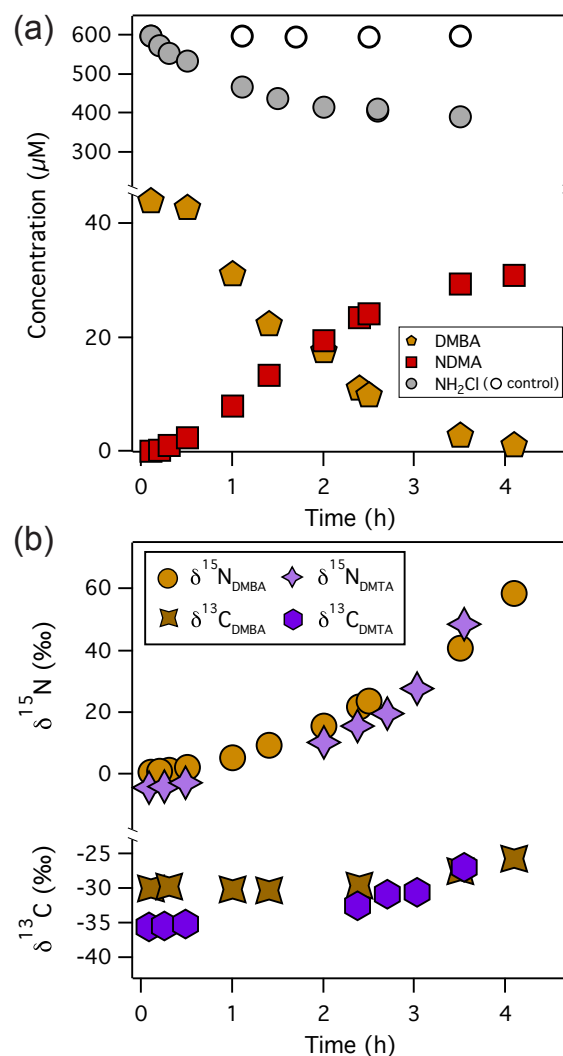

**Figure S2** NDMA formation from the reaction of DMBA (40  $\mu\text{M}$ ) with  $\text{NH}_2\text{Cl}$  (600  $\mu\text{M}$ ) in 10 mM phosphate buffer at pH 8.0. Panel (a) shows DMBA degradation,  $\text{NH}_2\text{Cl}$  consumption, and NDMA formation over time. Panel (b) illustrates  $\delta^{13}\text{C}$  and  $\delta^{15}\text{N}$  values of DMBA (brown symbols) and DMTA (purple symbols) over time. Standard deviations of triplicate  $\delta^{13}\text{C}$  and  $\delta^{15}\text{N}$  measurements of DMTA and DMBA were  $<0.4\text{‰}$  and  $<0.8\text{‰}$ , respectively, and smaller than the depicted symbols.

## S4.2 Bulk isotope enrichment factors

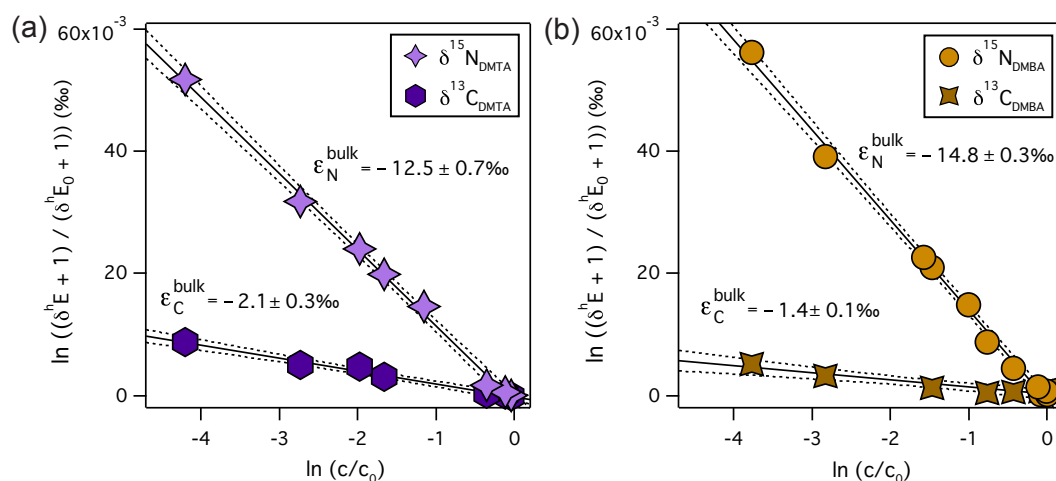

**Figure S3** Linearized C and N isotope fractionation of (a) DMTA and (b) DMBA used to derive C and N bulk isotope enrichment factors,  $\epsilon_C^{\text{bulk}}$  and  $\epsilon_N^{\text{bulk}}$ , respectively.

## S4.3 $^{15}\text{N}$ equilibrium isotope effect associated with the deprotonation of DMTA

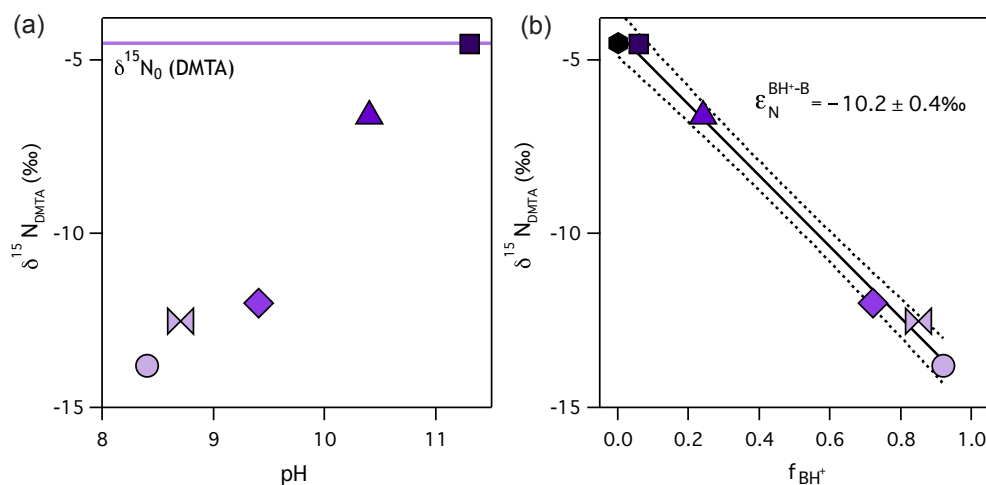

**Figure S4** N isotope signatures ( $\delta^{15}\text{N}_{\text{DMTA}}$ ) measured with SPME-GC/IRMS in the neutral fraction of DMTA (a) versus pH of the aqueous DMTA samples (from 8.4 - 11.3) in 10 mM phosphate buffer and (b) versus the fraction of protonated DMTA species ( $f_{\text{BH}^+}$ ). The concentration of protonated DMTA in a sample was calculated using peak areas of the GC/IRMS measurements. The slope of the regression line corresponds to the enrichment factor for the deprotonation of DMTA ( $\epsilon_N^{\text{BH}^+-\text{B}}$ ). The standard deviation of triplicate  $\delta^{15}\text{N}_{\text{DMTA}}$  measurements was  $<0.8\text{‰}$  and smaller than the depicted symbols.

## S4.4 Isotope enrichment factors and kinetic isotope effects associated with the reaction of DMTA and DMBA

The observable  $AKIE_N$  is the weighted average of the protonated ( $f_{BH^+}$ ) and deprotonated fraction ( $1-f_{BH^+}$ ) of the tertiary amine and their respective isotope effects as shown in eq. S1.<sup>4</sup>

$$AKIE_N = f_{BH^+} \cdot EIE_N^{BH^+-B} \cdot AKIE_N^B + (1 - f_{BH^+}) \cdot AKIE_N^B \quad (S1)$$

The  $AKIE_N^B$  that originates from the reaction of the deprotonated species is given by eq. S2.  $f_{BH^+}$  at pH 8.0 was determined with eq. S3 using a  $pK_a$  of  $9.75 \pm 0.3$  for DMTA (derived from SPME-GC/IRMS measurements) and a literature  $pK_a$  of 9.0 for DMBA.<sup>3</sup>

$$AKIE_N^B = \frac{AKIE_N}{(f_{BH^+} \cdot EIE_N^{BH^+-B}) + 1 - f_{BH^+}} \quad (S2)$$

$$f_{BH^+} = (1 + 10^{pH-pK_a})^{-1} \quad (S3)$$

The deprotonation  $EIE_N^{BH^+-B}$  was calculated with eq. S4, where the equilibrium isotope enrichment factor,  $\varepsilon_N^{BH^+-B}$ , was derived from the slope of the regression line of  $\delta^{15}N$  versus  $f_{BH^+}$  (see eq. S5 and Figure S4).<sup>4</sup>

$$EIE_N^{BH^+-B} = \frac{1}{1 + \varepsilon_N^{BH^+-B}} \quad (S4)$$

$$\delta^{15}N = \varepsilon_N^{BH^+-B} \cdot f_{BH^+} + \delta^{15}N_{ref} \quad (S5)$$

**Table S2** Carbon and nitrogen bulk isotope enrichment factors,  $\varepsilon_C^{bulk}$  and  $\varepsilon_N^{bulk}$ , and apparent kinetic isotope effects,  $AKIE_C$  and  $AKIE_N$ , for the chloramination of DMTA and DMBA.  $EIE_N^{BH^+-B}$  is the equilibrium isotope effect associated with deprotonation of DMTA.  $AKIE_N^B$  is the apparent kinetic isotope effect associated with the reaction of deprotonated DMTA and DMBA.

| Compound | $\varepsilon_C^{bulk}$<br>(‰) | $\varepsilon_N^{bulk}$<br>(‰) | $AKIE_C$<br>(-)     | $AKIE_N$<br>(-)     | $EIE_N^{BH^+-B}$<br>(-) | $AKIE_N^B$<br>(-)     |
|----------|-------------------------------|-------------------------------|---------------------|---------------------|-------------------------|-----------------------|
| DMTA     | $-2.1 \pm 0.3$                | $-12.5 \pm 0.7$               | $1.0021 \pm 0.0003$ | $1.0127 \pm 0.0007$ | $1.0103 \pm 0.0004$     | $1.0025 \pm 0.0011$   |
| DMBA     | $-1.4 \pm 0.1$                | $-14.8 \pm 0.3$               | $1.0014 \pm 0.0001$ | $1.0150 \pm 0.0003$ | <sup>a</sup>            | $1.0056 \pm 0.0007^b$ |

<sup>a</sup> not determined    <sup>b</sup> calculated with the  $EIE_N^{BH^+-B}$  of DMTA

## S5 C, H, and N isotope ratios of NDMA during chloramination of four tertiary amines

**Table S3** N isotope signatures of NDMA,  $\delta^{15}\text{N}_{\text{NDMA}}^{\text{ini}}$  and  $\delta^{15}\text{N}_{\text{NDMA}}^{\text{end}}$  in permil, determined at the beginning and the end of the reaction of ranitidine ( $3\ \mu\text{M}$ ), DFUR ( $3\ \mu\text{M}$ ), DMTA ( $40\ \mu\text{M}$ ), and DMBA ( $40\ \mu\text{M}$ ) with  $\text{NH}_2\text{Cl}$  which was added in 15-fold excess ( $45\ \mu\text{M}$  or  $600\ \mu\text{M}$ ), respectively. All experiments were carried out in 10 mM phosphate buffer at pH 8.0. The molar NDMA yield corresponding to the  $\delta^{15}\text{N}_{\text{NDMA}}$  values is specified in percent.

| Precursor  | $\delta^{15}\text{N}_{\text{NDMA}}^{\text{ini}}$<br>(‰) | NDMA yield<br>(%) | $\delta^{15}\text{N}_{\text{NDMA}}^{\text{end}}$<br>(‰) | NDMA yield<br>(%) | $\Delta^{15}\text{N}_{\text{NDMA}}$<br>(‰) |
|------------|---------------------------------------------------------|-------------------|---------------------------------------------------------|-------------------|--------------------------------------------|
| ranitidine | -24.1                                                   | 9                 | -3.5                                                    | 97                | +20.6                                      |
| DFUR       | -24.8                                                   | 12                | -8.7                                                    | 65                | +16.1                                      |
| DMTA       | -28.2                                                   | 8                 | -19.8                                                   | 75                | +8.4                                       |
| DMBA       | -26.9                                                   | 5                 | -13.2                                                   | 58                | +13.7                                      |



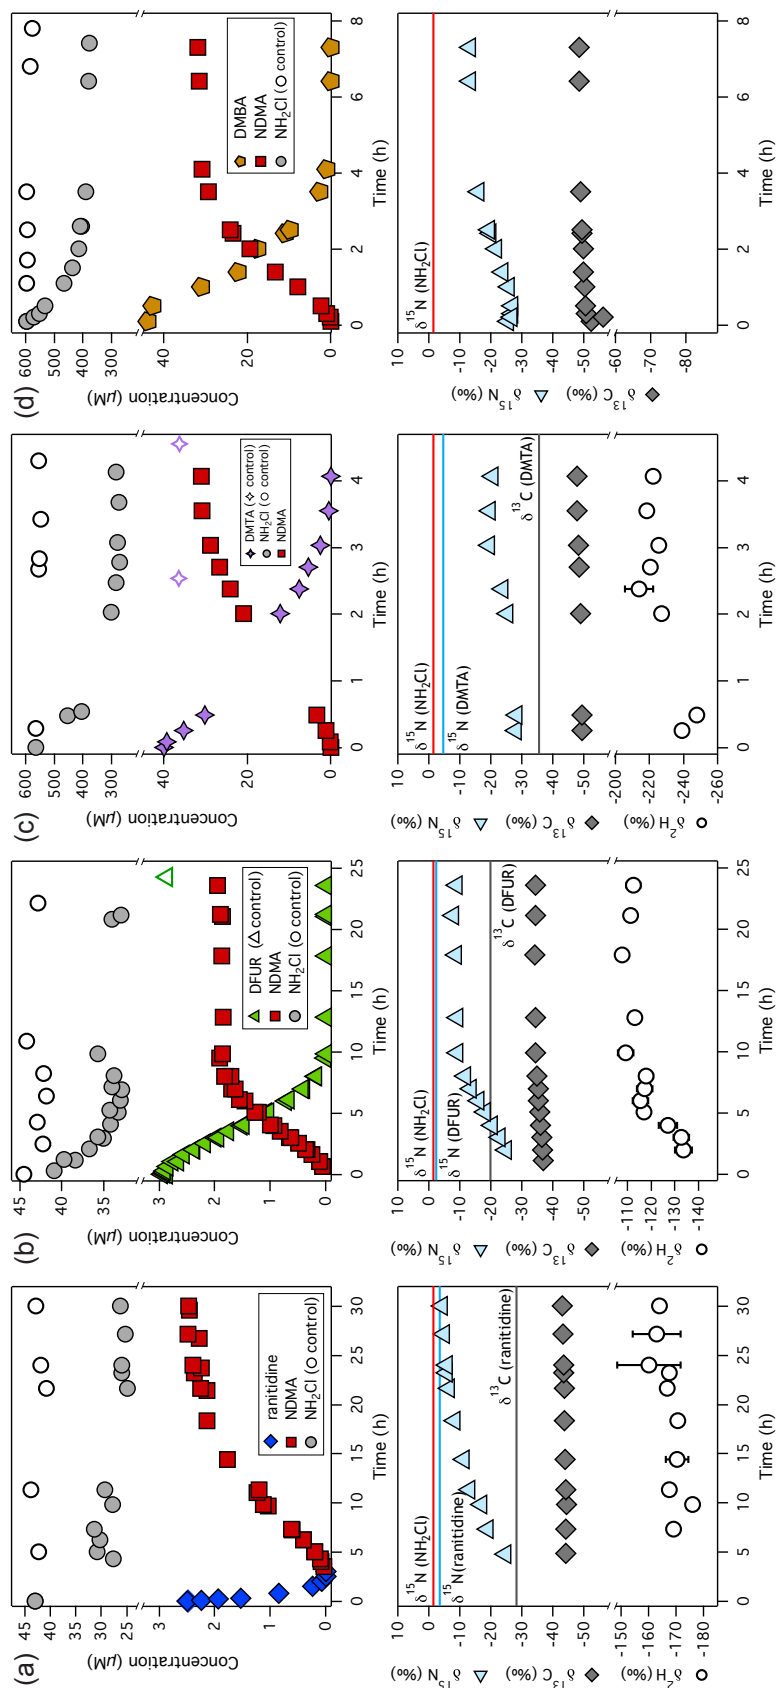

**Figure S5** NDMA formation and corresponding C, H, and N isotope signatures of NDMA during the reaction of (a) ranitidine ( $3 \mu\text{M}$ ), (b) DFUR ( $3 \mu\text{M}$ ), (c) DMTA ( $40 \mu\text{M}$ ), and (d) DMBA ( $40 \mu\text{M}$ ) with  $\text{NH}_2\text{Cl}$  which was added in 15-fold excess (corresponding to concentrations of  $45 \mu\text{M}$  and  $600 \mu\text{M}$   $\text{NH}_2\text{Cl}$ ) in 10 mM phosphate buffer at pH 8.0. Upper panels show the degradation of the tertiary amine precursor as well as the disappearance of  $\text{NH}_2\text{Cl}$  and formation of NDMA. Lower panels show  $\delta^{13}\text{C}$ ,  $\delta^2\text{H}$ , and  $\delta^{15}\text{N}$  values of NDMA over time. Solid lines represent initial  $\delta^{13}\text{C}$  and  $\delta^{15}\text{N}$  values of the tertiary amine precursors and  $\text{NH}_2\text{Cl}$ . Note that we used the reference isotope signature of  $\text{NH}_4\text{Cl}$  (Table S1) as proxy for the initial  $\delta^{15}\text{N}$  value of  $\text{NH}_2\text{Cl}$ . The initial C and N isotope signatures of DMBA were not determined. Standard deviations of triplicate  $\delta^{13}\text{C}$ ,  $\delta^2\text{H}$ , and  $\delta^{15}\text{N}$  measurements of NDMA were  $<0.4\text{‰}$ ,  $<11.5\text{‰}$ , and  $<0.5\text{‰}$ , respectively, and mostly smaller than the depicted symbols.

## S6 Impact of phosphate buffer concentration and buffer type on N isotope fractionation in NDMA

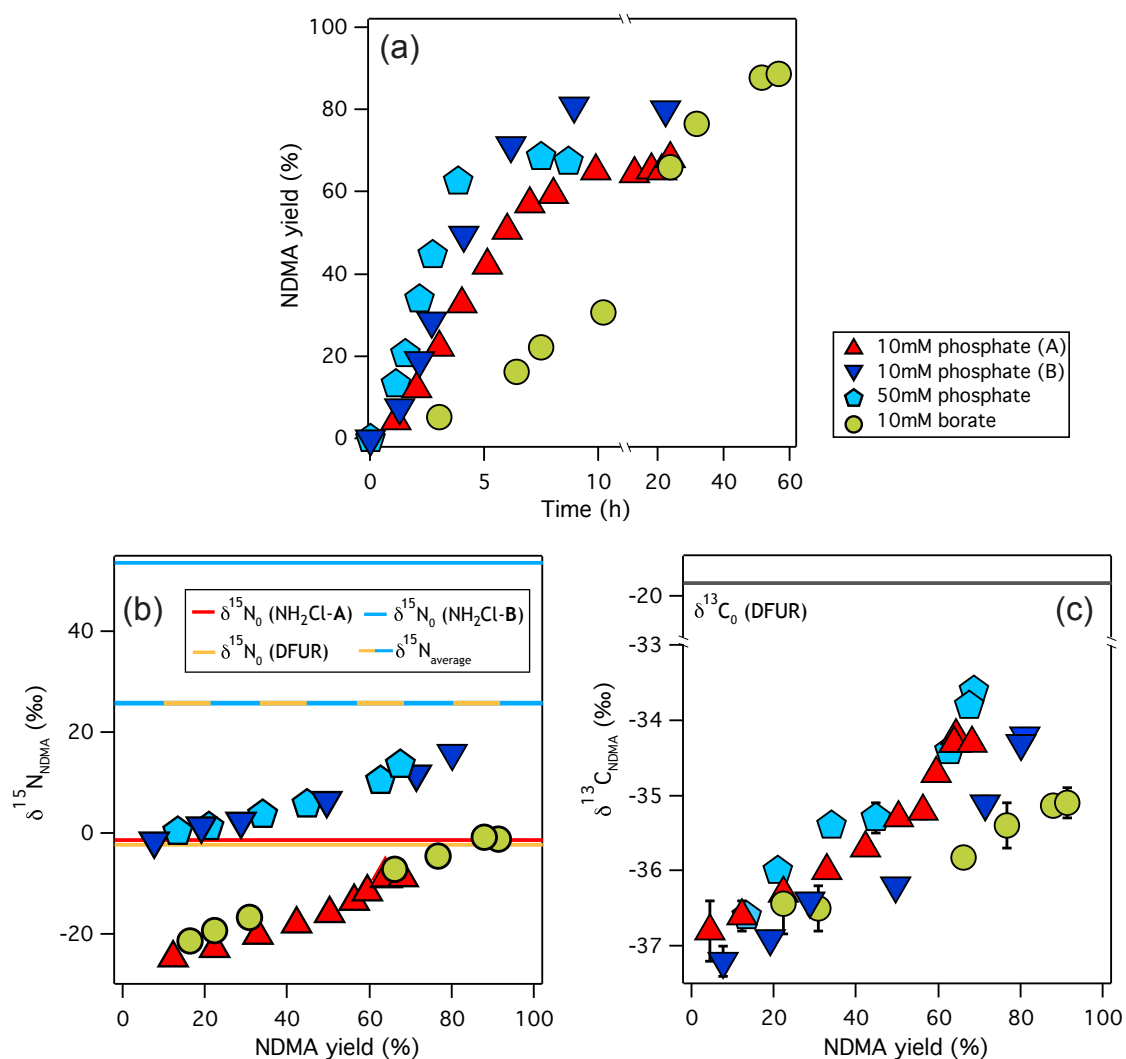

**Figure S6** Panel (a) shows the NDMA yield in percent formed during the reaction of DFUR (3  $\mu\text{M}$ ) and NH<sub>2</sub>Cl (45  $\mu\text{M}$ ) in 10 mM and 50 mM phosphate buffer and in 10 mM borate buffer at pH 8.0. Panels (b) and (c) show the corresponding  $\delta^{15}\text{N}$  and  $\delta^{13}\text{C}$  values of NDMA, respectively, versus the molar NDMA yield. Solid lines represent the initial isotope signatures of DFUR and NH<sub>2</sub>Cl. Note that experiments in 10 mM phosphate buffer were conducted with NH<sub>2</sub>Cl-A or NH<sub>2</sub>Cl-B that had distinctly different initial  $\delta^{15}\text{N}$  values (red vs. blue line in panel b). The experiment in 10 mM borate buffer was only conducted with NH<sub>2</sub>Cl-A, the one in 50 mM phosphate buffer only with NH<sub>2</sub>Cl-B what explains the shift in absolute  $\delta^{15}\text{N}$  values of NDMA. The initial N isotope signature of NH<sub>2</sub>Cl did not affect trends in N isotope signatures and  $\delta^{13}\text{C}$  values of NDMA.

## S7 Chloramination of 2-thiophenemethanol

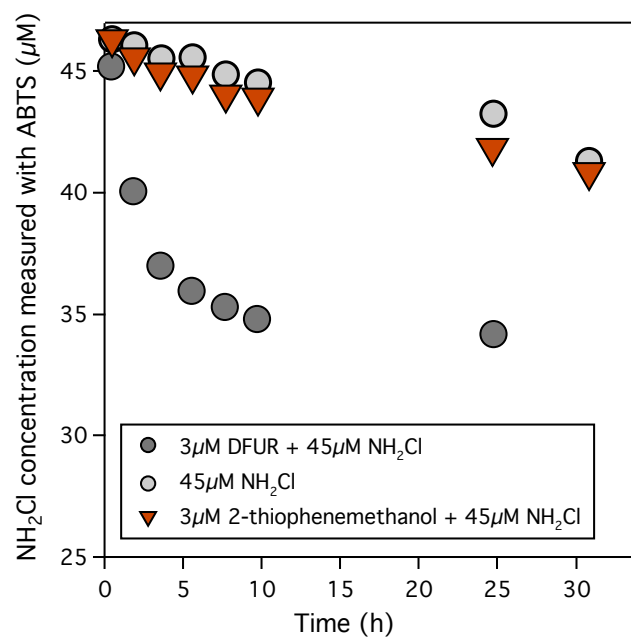

**Figure S7**  $\text{NH}_2\text{Cl}$  concentration measured with the ABTS method over 30 h in three different batches containing (i) 3  $\mu\text{M}$  DFUR and 45  $\mu\text{M}$   $\text{NH}_2\text{Cl}$ , (ii) 45  $\mu\text{M}$   $\text{NH}_2\text{Cl}$ , and (iii) 3  $\mu\text{M}$  2-thiophenemethanol and 45  $\mu\text{M}$   $\text{NH}_2\text{Cl}$  in 10 mM phosphate buffer at pH 8.0. Note that  $\text{NH}_2\text{Cl}$  concentrations were not corrected by the self-decay of chloramine observed in the  $\text{NH}_2\text{Cl}$  control.

## S8 Impact of solution pH on isotope fractionation in NDMA

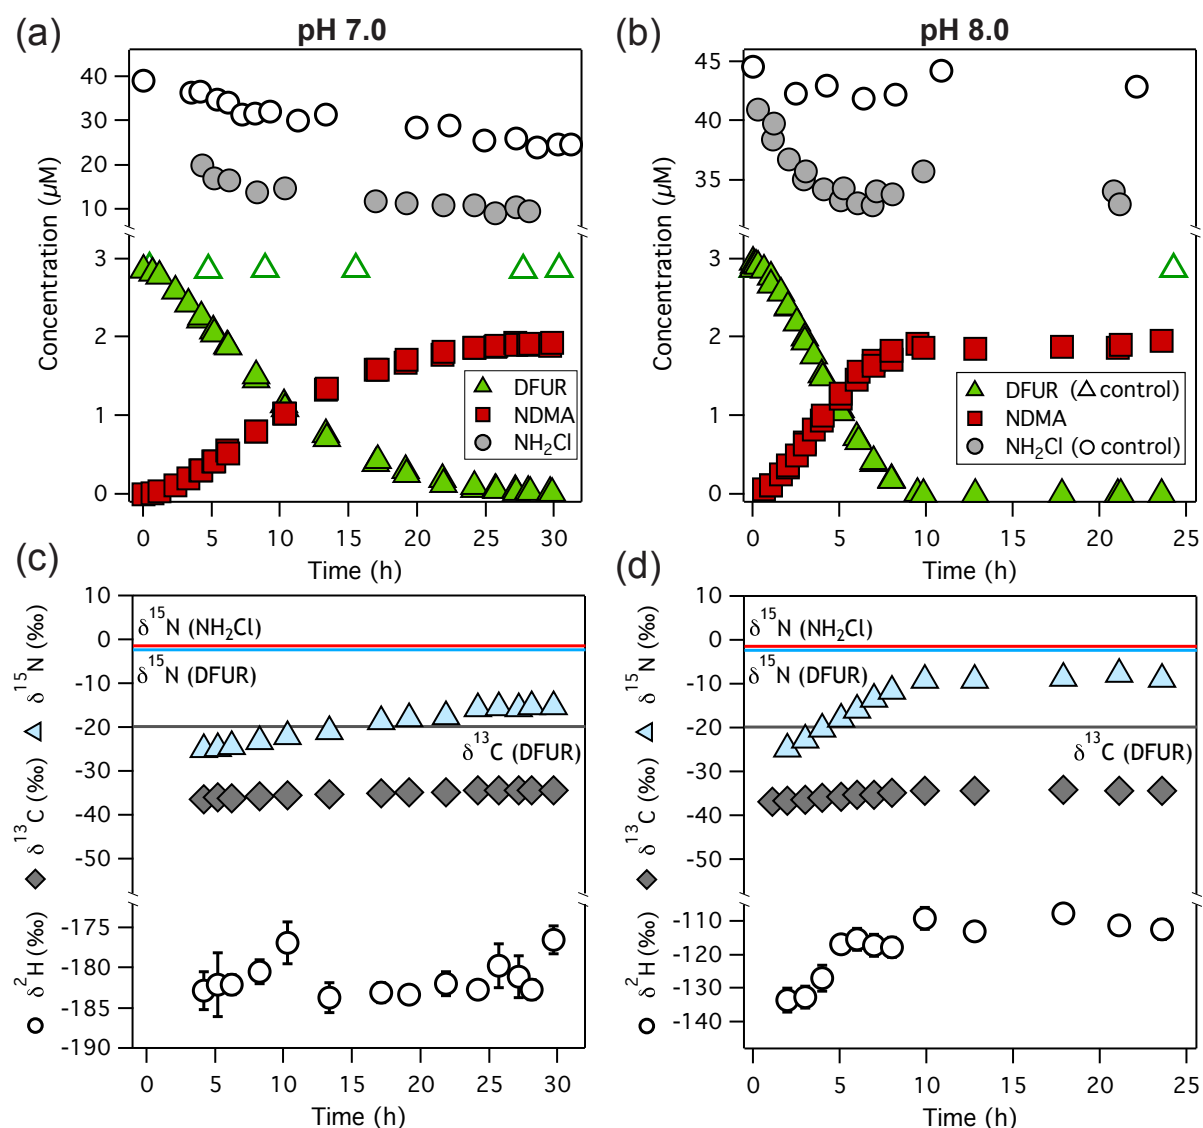

**Figure S8** NDMA formation and corresponding C, H, and N isotope signatures of NDMA during the reaction of DFUR (3  $\mu\text{M}$ ) with  $\text{NH}_2\text{Cl}$  (45  $\mu\text{M}$ ) at pH 7.0 and pH 8.0 in 10 mM phosphate buffer. Upper panels (a) and (b) show the kinetics of DFUR and  $\text{NH}_2\text{Cl}$  degradation as well as NDMA formation at pH 7.0 and 8.0, respectively. Lower panels (c) and (d) show the corresponding  $\delta^{13}\text{C}$ ,  $\delta^2\text{H}$ , and  $\delta^{15}\text{N}$  values of NDMA over time. Solid lines represent the initial C and N isotope signatures of the precursor compounds DFUR and  $\text{NH}_2\text{Cl}$ . Note that we report the reference isotope signature of  $\text{NH}_4\text{Cl}$  (Table S1) as proxy for the initial  $\delta^{15}\text{N}$  value of  $\text{NH}_2\text{Cl}$ . Standard deviations of triplicate  $\delta^{13}\text{C}$ ,  $\delta^2\text{H}$ , and  $\delta^{15}\text{N}$  measurements of NDMA were  $<0.4\text{‰}$ ,  $<4.0\text{‰}$ , and  $<0.3\text{‰}$ , respectively, and mostly smaller than the depicted symbols.

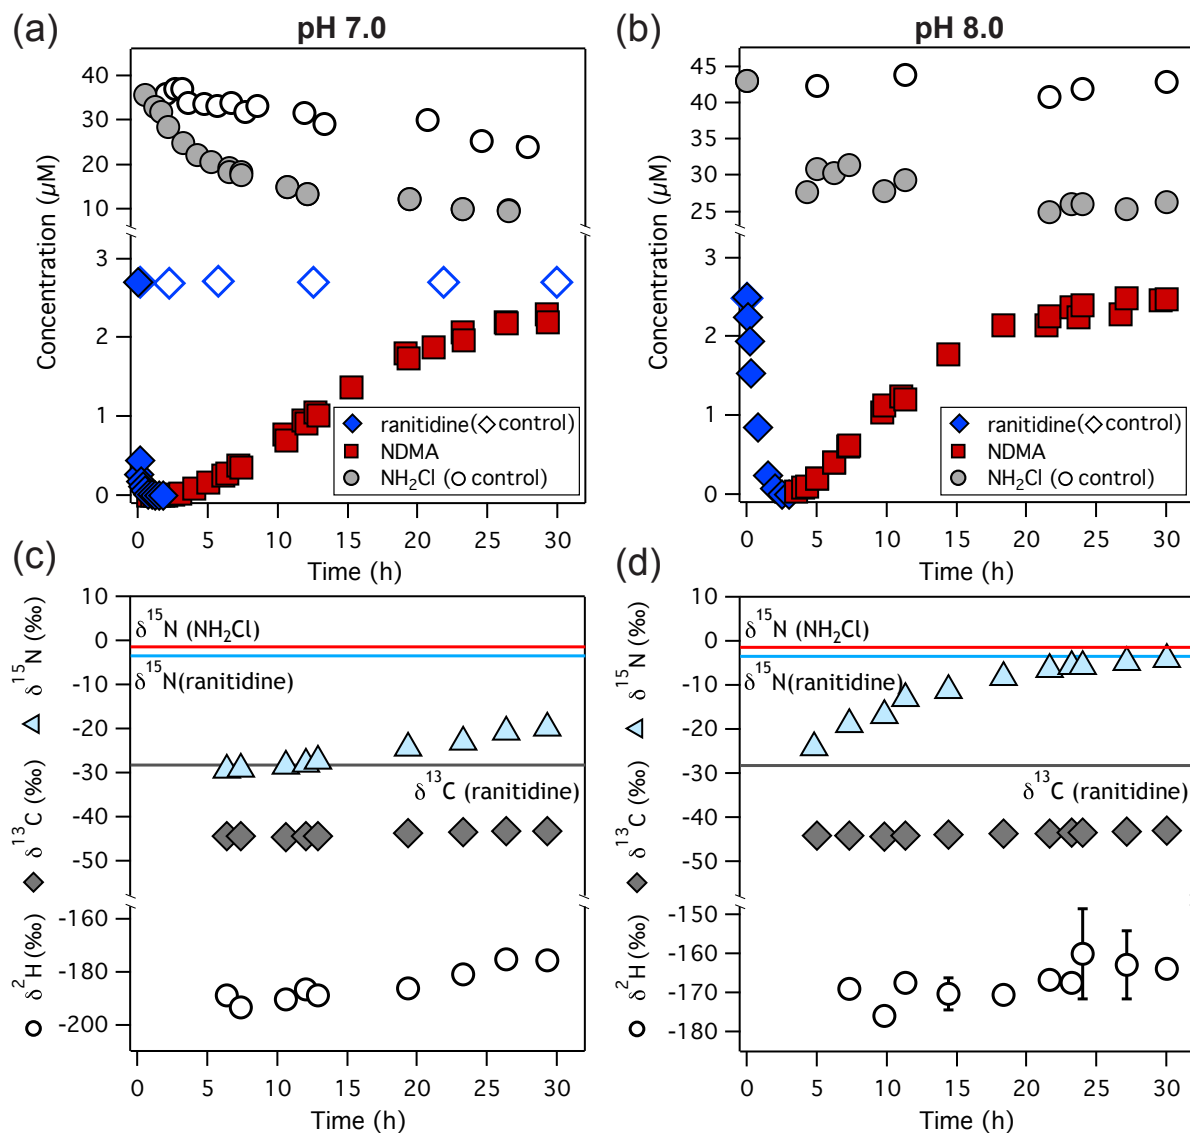

**Figure S9** NDMA formation and corresponding C, H, and N isotope signatures of NDMA during the reaction of ranitidine (3  $\mu\text{M}$ ) with  $\text{NH}_2\text{Cl}$  (45  $\mu\text{M}$ ) at pH 7.0 and pH 8.0 in 10 mM phosphate buffer. Upper panels (a) and (b) show the kinetics of ranitidine and  $\text{NH}_2\text{Cl}$  degradation as well as NDMA formation at pH 7.0 and 8.0, respectively. Lower panels (c) and (d) show the corresponding  $\delta^{13}\text{C}$ ,  $\delta^2\text{H}$ , and  $\delta^{15}\text{N}$  values of NDMA over time. Solid lines represent the initial C and N isotope signatures of the precursor compounds ranitidine and  $\text{NH}_2\text{Cl}$ . Note that we report the reference isotope signature of  $\text{NH}_4\text{Cl}$  (Table S1) as proxy for the initial  $\delta^{15}\text{N}$  value of  $\text{NH}_2\text{Cl}$ . Standard deviations of triplicate  $\delta^{13}\text{C}$ ,  $\delta^2\text{H}$ , and  $\delta^{15}\text{N}$  measurements of NDMA were  $<0.3\text{‰}$ ,  $<11.5\text{‰}$ , and  $<0.5\text{‰}$ , respectively, and mostly smaller than the depicted symbols.

## S9 References

- [1] Böhlke, J. K., Gwinn, C. J., and Coplen, T. B. (1993). New reference materials for nitrogen-isotope-ratio measurements. *Geostandard Newslett.*, 17(1):159–164.
- [2] Jochmann, M. A., Blessing, M., Haderlein, S. B., and Schmidt, T. C. (2006). A new approach to determine method detection limits for compound-specific isotope analysis of volatile organic compounds. *Rapid Commun. Mass Spectrom.*, 20(24):3639–3648.
- [3] Rosenblatt, D. H., Hull, L. A., Luca, D. C. D., Davis, G. T., Weglein, R. C., and Williams, H. K. R. (1967). Oxidations of amines. II. Substituent effects in chlorine dioxide oxidations. *J. Am. Chem. Soc.*, 89(5):1158–1163.
- [4] Skarpeli-Liati, M., Arnold, W. A., Turgeon, A., Cramer, C. J., and Hofstetter, T. B. (2011). pH-Dependent equilibrium isotope fractionation associated with compound-specific nitrogen and carbon isotope analysis by SPME-GC/IRMS. *Anal. Chem.*, 83(5):1641–1648.
